# Supplementary material
Source: PubMed Central journal article supplement (PMC9575636)
Supplement: 41577_2022_786_MOESM1_ESM.pdf [file 41577_2022_786_MOESM1_ESM.pdf]

---

**Supplementary information**

---

**Allergen immunotherapy: past, present  
and future**

---

In the format provided by the  
authors and unedited

**SUPL. TABLE 1. RANDOMIZED CONTROLLED, CLINICAL TRIALS SHOWING LONG-TERM EFFICACY OF ALLERGEN IMMUNOTHERAPY FOR ALLERGIC RHINITIS**

| AUTHOR <sup>REF</sup> ,<br>YEAR, COUNTRY             | SCIT | SLIT                 | PLACEBO | PATIENTS' CHARACTERISTICS                                                                                                                               | ALLERGEN                                                           | UNITS | MAINTENANCE<br>DOSE AND<br>FREQUENCY                                                                                            | TOTAL STUDY<br>DURATION (Y) | AIT DURATION (Y) | YEARS AFTER<br>CESSATION | YEARS BLINDED<br>AFTER CESSATION | OUTCOME AT THE END<br>OF THE TREATMENT<br>PERIOD                                                                                                             | OUTCOME AT THE END<br>OF THE OFF-<br>TREATMENT<br>OBSERVATION PERIOD                                                                                         |
|------------------------------------------------------|------|----------------------|---------|---------------------------------------------------------------------------------------------------------------------------------------------------------|--------------------------------------------------------------------|-------|---------------------------------------------------------------------------------------------------------------------------------|-----------------------------|------------------|--------------------------|----------------------------------|--------------------------------------------------------------------------------------------------------------------------------------------------------------|--------------------------------------------------------------------------------------------------------------------------------------------------------------|
| <b>DURHAM</b> <sup>1</sup><br>1999<br>UNITED KINGDOM | 21   | -                    | 19      | <b>Age:</b> 19-52 years<br><b>Dx:</b> Severe SAR associated with grass pollen<br><b>Asthma:</b> Patients with chronic asthma were excluded              | <i>Phleum pratense</i>                                             | SQ-U  | <b>Dose:</b> 100,000 SQ-U (20 µg of <i>Phl p 5</i> )<br><b>Freq:</b> Monthly                                                    | 7                           | Up to 7          | 3                        | 3                                | <b>TSS Year 4</b><br><b>Maintenance group:</b> AUC 626 (70–3528)<br><b>Discontinuation group:</b> 798 (0-2289)<br><b>No immunotherapy:</b> 2615 (609–10,416) | <b>TSS Year 7</b><br><b>Maintenance group:</b> AUC 921 (0–2299)<br><b>Discontinuation group:</b> 504 (45–4567)<br><b>No immunotherapy:</b> 2863 (774–12,033) |
| <b>JACOBSEN</b> <sup>2</sup><br>2007<br>DENMARK      | 103  | -                    | 102*    | <b>Age:</b> 6 to 14 years<br><b>Dx:</b> Grass and/or birch-pollen induced ARC<br><b>Asthma:</b> 0%                                                      | <i>Phleum pratense</i> and/or <i>birch pollen Betula verrucosa</i> | SQ-U  | <b>Dose:</b> 100,000 SQ [20 µg of <i>Phl p 5</i> (grass) / 12 µg of <i>Bet v 1</i> (birch)]<br><b>Freq:</b> 6 weeks (± 2 weeks) | 10                          | 3                | 7                        | 0                                | <b>Rhinitis VAS – Year 3</b><br>Active vs Control<br><br>p <0.01                                                                                             | <b>Rhinitis VAS – Year 10</b><br>Active vs Control<br>-19.9 (A) vs -11.5 (C) mm<br>p <0.05                                                                   |
| <b>BOZEK</b> <sup>3</sup><br>2020<br>POLAND          | 33   | -                    | 29      | <b>Age:</b> 65 to 75 years<br><b>Dx:</b> Moderate or severe intermittent allergic rhinitis<br><b>Asthma:</b> 0%                                         | Grass mix                                                          | AUM   | <b>Dose:</b> 13.1 µg <i>Phl p 5</i><br><b>Freq:</b> Every 2 weeks<br><b>Schedule:</b> Pre-seasonal (Jan-Apr)                    | 6                           | 3                | 3                        | 3                                | <b>CSMS Year 3</b><br>Baseline: 2.15 ± 1.04<br>SCIT: 1.13 ± 0.73 (p=0.03)<br><br>Baseline: 2.31 ± 1.13<br>Placebo: 2.08 ± 0.65 (p=0.28)                      | <b>CSMS Year 6</b><br><br>SCIT: 1.41 ± 0.72<br><br>Placebo: 2.41 ± 1.11                                                                                      |
| <b>DURHAM</b> <sup>4</sup><br>2012<br>UNITED KINGDOM | -    | 316                  | 318     | <b>Age:</b> 18-65 years<br><b>Dx:</b> 2-year history of grass-pollen induced ARC<br><b>Asthma:</b> Patients with <i>perennial</i> asthma were excluded. | <i>Phleum pratense</i>                                             | SQ-T  | <b>Dose:</b> 75,000 SQ-T (15 µg <i>Phl p 5</i> )<br><b>Freq:</b> Daily                                                          | 5                           | 3                | 2                        | 2                                | <b>RCSS</b><br>Reduction relative to placebo<br><br><b>Season 3</b><br>-29% (p <0.001)                                                                       | <b>RCSS</b><br>Reduction relative to placebo<br><br><b>Follow-up season 5</b><br>-25% (p <0.004)                                                             |
| <b>DIDIER</b> <sup>5</sup><br>2015<br>FRANCE         | -    | 207 (2M)<br>207 (4M) | 219     | <b>Age:</b> 18-50 years<br><b>Dx:</b> 2-year history of grass-pollen induced ARC<br><b>Asthma:</b> 11-16%                                               | 5 grasses mix                                                      | IR    | <b>Dose:</b> 300 IR (25 µg group 5 major allergen)<br><b>Freq:</b> Daily                                                        | 5                           | 3                | 2                        | 2                                | <b>DRTSS</b><br>Reduction relative to placebo [4M]<br><br><b>Year 3</b><br>-38.5% (p <0.0001)                                                                | <b>DRTSS</b><br>Reduction relative to placebo [4M]<br><br><b>Follow-up year 5</b><br>-23.5%                                                                  |

|                                                         |    |                                    |     |                                                                                                         |                                                |              |                                                                                                                                                                  |   |   |   |   |                                                                                                                                                         |                                                                                                                                                      |
|---------------------------------------------------------|----|------------------------------------|-----|---------------------------------------------------------------------------------------------------------|------------------------------------------------|--------------|------------------------------------------------------------------------------------------------------------------------------------------------------------------|---|---|---|---|---------------------------------------------------------------------------------------------------------------------------------------------------------|------------------------------------------------------------------------------------------------------------------------------------------------------|
| <b>OTT</b> <sup>6</sup><br>2009<br>GERMANY              | -  | 142                                | 67  | <b>Age:</b> 7-64 years<br><b>Dx:</b> ARC associated with grass pollen<br><b>Asthma:</b> 11-14%          | 5 grasses mix                                  | IR           | <b>Dose:</b> 300 IR/mL (21 µg/mL of <i>Phl p 5</i> )<br><b>Freq:</b> Daily                                                                                       | 4 | 3 | 1 | 1 | <b>SLIT CHANGE</b><br><b>Season 3</b><br>-1.02±4.54<br><b>PLACEBO CHANGE</b><br><b>Season 3</b><br>+1.32±4.40<br>p = 0.0004                             | <b>SLIT CHANGE</b><br><b>Follow-up</b><br>-1.94±5.05<br><b>PLACEBO CHANGE</b><br><b>Follow-up</b><br>-0.30±4.40<br>p = 0.015                         |
| <b>BERGMANN</b> <sup>7</sup><br>2014<br>GERMANY         | -  | 169<br>(500 IR)<br>170<br>(300 IR) | 170 | <b>Age:</b> 18-50 years<br><b>Asthma:</b> 29-32%                                                        | <i>D pteronyssinus</i><br>and <i>D farinae</i> | IR           | <b>Dose:</b> 300 IR or 500 IR (16 or 28 µg <i>Der p 1</i> )<br><b>Freq:</b> Daily                                                                                | 2 | 1 | 1 | 1 | <b>AAdSS - Year 1</b><br><b>500IR:</b> -0.78 (-1.34 to -0.22) p = 0.0066, % -20.2<br><b>300IR:</b> -0.69 (-1.25 to -0.14) p = 0.0150, % -17.9           | <b>AAdSS - Year 2</b><br><b>500IR:</b> % -19.1, p <0.05<br><b>300IR:</b> % -17.0, p <0.05                                                            |
| <b>VALOVIRTA</b> <sup>8</sup><br>2018<br>FINLAND        | -  | 398                                | 414 | <b>Age:</b> 5 to 12 years<br><b>Dx:</b> 2-year history of grass-pollen induced ARC<br><b>Asthma:</b> 0% | <i>Phleum pratense</i>                         | SQ-T         | <b>Dose:</b> 75,000 SQ-T (15 µg <i>Phl p 5</i> )<br><b>Freq:</b> Daily                                                                                           | 5 | 3 | 2 | 2 | <b>ARC VAS score Year 3</b><br>-9.23 (5.7 - 12.8) -30%,<br>p <0.001                                                                                     | <b>ARC VAS score Year 5</b><br>-5.8 (2.2 - 9.4), -23%,<br>p = 0.002                                                                                  |
| <b>YONEKURA</b> <sup>9</sup><br>2021<br>JAPAN           | -  | 2K: 260<br>5K: 264<br>10K:259      | 259 | <b>Age:</b> 5 to 64 years<br><b>Dx:</b> ARC symptoms for 2 consecutive seasons<br><b>Asthma:</b>        | Japanese cedar                                 | JAU          | <b>Dose:</b> 5,000 JAU<br><b>Freq:</b> Daily                                                                                                                     | 5 | 3 | 2 | 2 | <b>TNSMS</b><br>Reduction relative to placebo<br><b>Year 3</b><br>3.04 (2.21 to 3.87)<br>- 46.3% (36.6% to 54.8%)<br>p <0.001                           | <b>TNSMS</b><br>Reduction relative to placebo<br><b>Year 5</b><br>2.62 (1.58 to 3.66)<br>-34.0% (22.4% to 44.1%)<br>p <0.001                         |
| <b>SCADDING</b> <sup>10</sup><br>2017<br>UNITED KINGDOM | 36 | 36                                 | 34  | <b>Age:</b> 18 to 65 years<br><b>Dx:</b> Moderate to severe ARC<br><b>Asthma:</b> Mild asthma           | <i>Phleum pratense</i>                         | SQ-T<br>SQ-U | <b>Dose SCIT:</b> 100,000 SQ-U (20 µg of <i>Phl p 5</i> )<br><b>Freq:</b> Monthly<br><b>Dose SLIT:</b> 75,000 SQ-T (15 µg <i>Phl p 5</i> )<br><b>Freq:</b> Daily | 3 | 2 | 1 | 1 | <b>TNSS (10-hour AUC) vs placebo</b><br>NAC Year 2<br><b>SLIT</b> -1.42 (-2.61 to -0.22)<br>p = 0.02<br><b>SCIT</b> -2.11 (-3.22 to -1.01)<br>p < 0.001 | <b>TNSS (10-hour AUC) vs placebo</b><br>NAC Year 3<br><b>SLIT</b> -0.30 (-1.52 to 0.92)<br>p = 0.62<br><b>SCIT</b> -0.90 (-1.96 to 0.16)<br>p = 0.10 |

2M: two-month pre-coseasonal schedule; 4M: four-month pre-coseasonal schedule; AAdSS: average adjusted symptom score; AIT: allergen immunotherapy; ARC: allergic rhinoconjunctivitis; AU: allergy units; AUC: area under the curve; AUM: allergy unit milliequivalent; CSMS: combined symptom medication score; DCS: daily combined symptoms medication score; Dx: disease; IR: index of reactivity; JAU: Japanese allergy unit; NAC: nasal allergen challenge; PP: per protocol; RCSS: rhinoconjunctivitis symptom score; SAR: seasonal allergic rhinitis; SCIT: subcutaneous immunotherapy; SLIT: sublingual immunotherapy; SQ-T: standardised quality units tablets; SQ-U: standardised quality units; TNSMS: total nasal symptom and medication scores; TNSS: total nasal symptom scores; TSS: total symptom scores; VAS: visual analogue scale.

1. Durham, S. R. *et al.* Long-term clinical efficacy of grass-pollen immunotherapy. *N Engl J Med* **341**, 468-475 (1999).
2. Jacobsen, L. *et al.* Specific immunotherapy has long-term preventive effect of seasonal and perennial asthma: 10-year follow-up on the PAT study. *Allergy* **62**, 943-948 (2007).

3. Bozek, A., Cudak, A. & Walter Canonica, G. Long-term efficacy of injected allergen immunotherapy for treatment of grass pollen allergy in elderly patients with allergic rhinitis. *Allergy Asthma Proc* **41**, 271-277 (2020).
4. Durham, S. R. *et al.* SQ-standardized sublingual grass immunotherapy: confirmation of disease modification 2 years after 3 years of treatment in a randomized trial. *J Allergy Clin Immunol* **129**, 717-725 e715 (2012).
5. Didier, A., Malling, H. J., Worm, M., Horak, F. & Sussman, G. L. Prolonged efficacy of the 300IR 5-grass pollen tablet up to 2 years after treatment cessation, as measured by a recommended daily combined score. *Clin Transl Allergy* **5**, 12 (2015).
6. Ott, H. *et al.* Efficacy of grass pollen sublingual immunotherapy for three consecutive seasons and after cessation of treatment: the ECRIT study. *Allergy* **64**, 1394-1401 (2009).
7. Bergmann, K. C. *et al.* Efficacy and safety of sublingual tablets of house dust mite allergen extracts in adults with allergic rhinitis. *J Allergy Clin Immunol* **133**, 1608-1614 e1606 (2014).
8. Valovirta, E. *et al.* Results from the 5-year SQ grass sublingual immunotherapy tablet asthma prevention (GAP) trial in children with grass pollen allergy. *J Allergy Clin Immunol* **141**, 529-538 e513 (2018).
9. Yonekura, S. *et al.* Disease-modifying effect of japanese cedar pollen sublingual immunotherapy tablets. *J Allergy Clin Immunol Pract* **9**, 4103-4116 (2021).
10. Scadding, G. W. *et al.* Effect of 2 years of treatment with sublingual grass pollen immunotherapy on nasal response to allergen challenge at 3 years among patients with moderate to severe seasonal allergic rhinitis: the GRASS randomized clinical trial. *JAMA* **317**, 615-625 (2017).
